# Supplementary material for: Comparison of the Purity and Impurity of Glucagon-for-Injection Products under Various Stability Conditions
Source: MDPI journal article supplement (doi:10.3390/scipharm90020032), 2022-05-17
Supplement: s1 [file s1]

Archive with 6 entries (6 files):
- Figures S1.pdf
- Figures S2.pdf
- Figures S3.pdf
- Figures S4.pdf
- Table S1.pdf
- Table S2.pdf
