# Supplementary material for: Comparison of the Purity and Impurity of Glucagon-for-Injection Products under Various Stability Conditions
Source: MDPI journal article supplement (doi:10.3390/scipharm90020032), 2022-05-17
Supplement: s1 [file s1 › Figures S3.pdf]

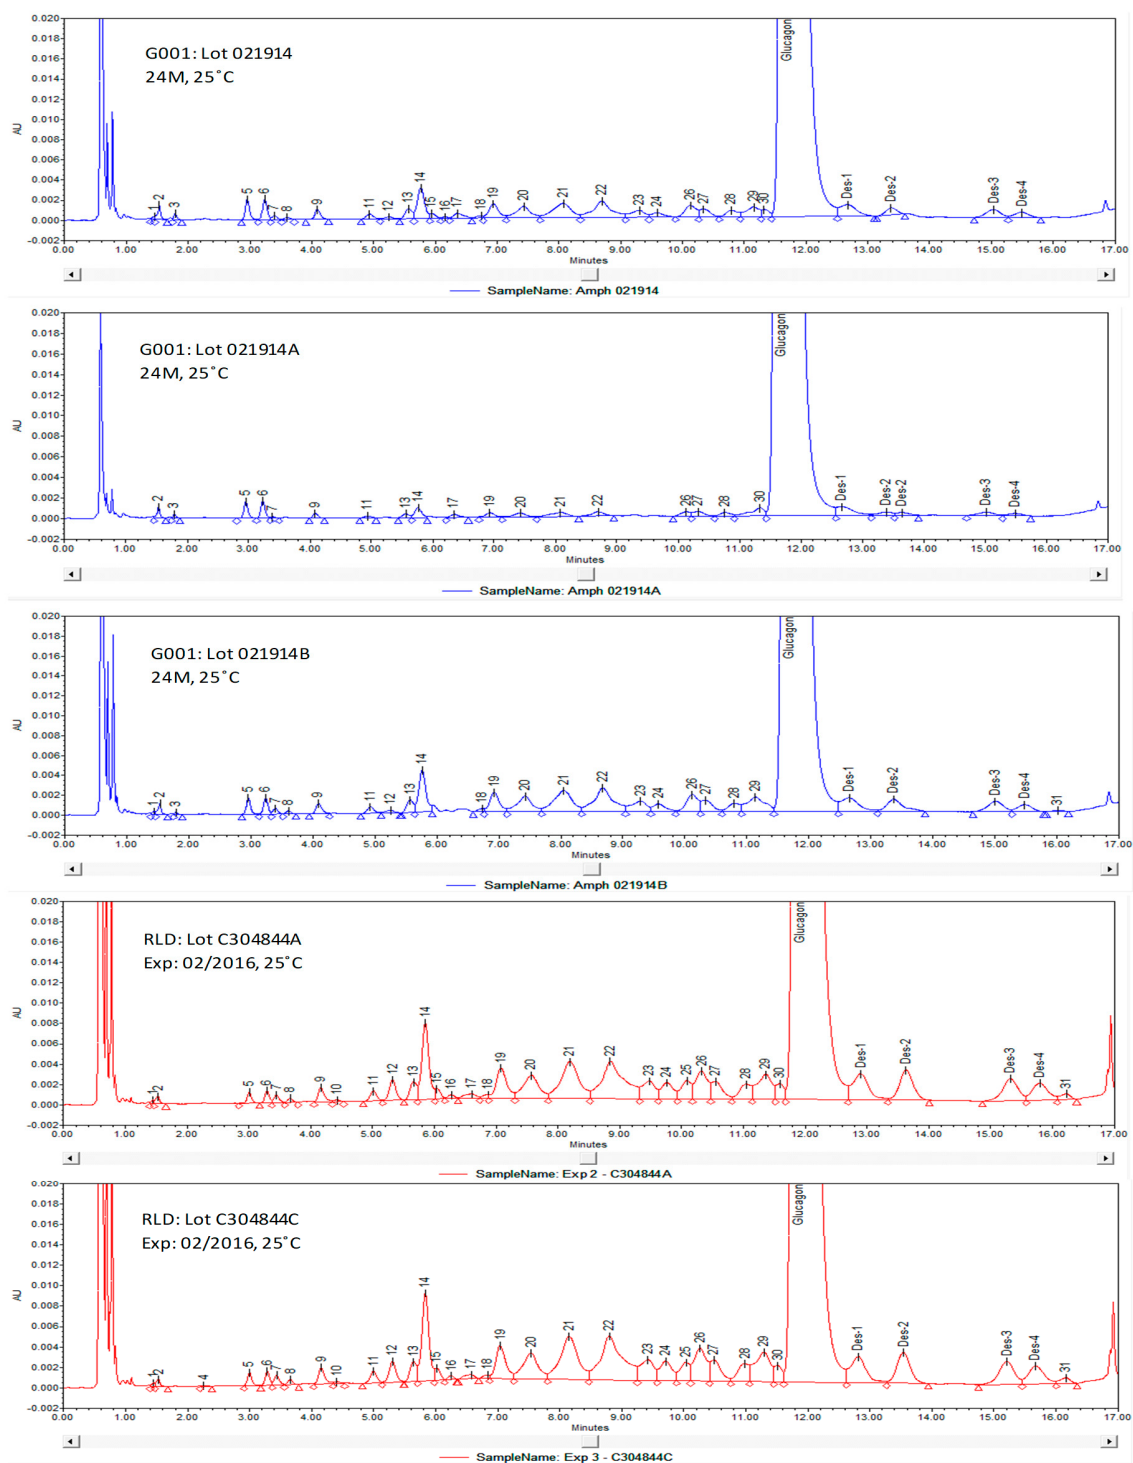

Figures S3: Glucagon Impurity Profile by UPLC at 24 Months, G001 at 25°C, RLD at 20-25 °C. G001 = AMP-glucagon; RLD = ELI-glucagon
