# Supplementary material for: Comparison of the Purity and Impurity of Glucagon-for-Injection Products under Various Stability Conditions
Source: MDPI journal article supplement (doi:10.3390/scipharm90020032), 2022-05-17
Supplement: s1 [file s1 › Table S1.pdf]

Table S1: Retention Times of UPLC for Glucagon Samples (in minutes)

| Peak # | Peak Name | Initial Time, 25°C |             |             |              | 6 Months, 25°C |             |             |              | 24 Months, 25°C |             |             |              |              | 6 Months, 40°C |             |             |              |
|--------|-----------|--------------------|-------------|-------------|--------------|----------------|-------------|-------------|--------------|-----------------|-------------|-------------|--------------|--------------|----------------|-------------|-------------|--------------|
|        |           | G001               |             |             | RLD          | G001           |             |             | RLD          | G001            |             |             | RLD          |              | G001           |             |             | RLD          |
|        |           | 0219<br>14         | 0219<br>14A | 0219<br>14B | C4641<br>45A | 0219<br>14     | 0219<br>14A | 0219<br>14B | C2155<br>47C | 0219<br>14      | 0219<br>14A | 0219<br>14B | C3048<br>44A | C3048<br>44C | 0219<br>14     | 0219<br>14A | 0219<br>14B | C2155<br>47C |
| 1      | Imp-1     | 1.64               | 1.63        | 1.63        | 1.43         |                |             |             |              | 1.45            |             | 1.43        | 1.45         | 1.45         |                |             |             |              |
| 2      | Imp-2     | 1.75               | 1.74        |             | 1.52         |                |             |             |              | 1.53            | 1.53        | 1.53        | 1.53         | 1.53         |                |             |             |              |
| 3      | Imp-3     | 2.00               | 1.98        | 1.98        |              |                |             |             |              | 1.79            | 1.79        | 1.79        |              |              | 1.97           |             | 1.95        | 1.95         |
| 4      | Imp-4     |                    |             |             |              |                |             |             |              |                 |             |             |              | 2.26         |                |             |             | 2.21         |
| 5      | Imp-5     | 2.71               | 2.68        | 2.68        | 2.96         | 2.55           | 2.55        | 2.56        | 2.56         | 2.96            | 2.96        | 2.96        | 3.01         | 3.00         | 2.59           | 2.55        | 2.55        | 2.55         |
| 6      | Imp-6     | 2.93               | 2.90        | 2.90        | 3.24         | 2.78           | 2.77        | 2.78        | 2.79         | 3.24            | 3.23        | 3.23        | 3.29         | 3.28         | 2.80           | 2.75        | 2.75        | 2.75         |
| 7      | Imp-7     |                    |             |             | 3.39         | 2.90           |             | 2.90        | 2.91         | 3.39            | 3.38        | 3.39        | 3.45         | 3.44         |                |             |             |              |
| 8      | Imp-8     |                    |             |             | 3.61         |                |             | 3.09        | 3.08         | 3.60            |             | 3.60        | 3.67         | 3.66         | 3.06           | 3.00        | 3.00        | 3.01         |
| 9      | Imp-9     | 3.80               | 3.77        | 3.76        | 4.09         | 3.48           | 3.71        | 3.49        | 3.48         | 4.09            | 4.08        | 4.08        | 4.16         | 4.15         | 3.44           | 3.38        | 3.39        | 3.39         |
| 10     | Imp-10    |                    |             |             | 4.34         | 3.31           |             | 3.73        | 3.72         |                 |             |             | 4.43         | 4.41         | 3.70           | 3.62        | 3.61        | 3.57         |
| 11     | Imp-11    | 4.83               |             | 4.78        | 4.93         | 4.10           |             | 4.12        | 4.13         | 4.93            | 4.94        | 4.92        | 5.01         | 5.00         | 4.05           |             | 3.99        | 3.99         |
| 12     | Imp-12    | 5.02               |             | 4.95        | 5.23         | 4.29           | 4.29        | 4.28        | 4.45         | 5.25            |             | 5.25        | 5.32         | 5.30         | 4.30           | 4.24        | 4.23        | 4.26         |
| 13     | Imp-13    |                    |             |             | 5.57         | 4.65           | 4.65        | 4.66        | 4.65         | 5.57            | 5.57        | 5.57        | 5.67         | 5.65         | 4.55           | 4.45        | 4.46        | 4.46         |
| 14     | Imp-14    | 5.55               | 5.48        | 5.49        | 5.76         | 4.83           | 4.83        | 4.85        | 4.84         | 5.77            | 5.77        | 5.76        | 5.85         | 5.83         | 4.75           | 4.66        | 4.66        | 4.67         |
| 15     | Imp-15    |                    |             |             | 5.94         | 5.04           |             | 5.05        | 5.05         | 5.94            |             |             | 6.03         | 6.01         | 4.94           | 4.85        | 4.84        | 4.90         |
| 16     | Imp-16    |                    |             |             | 6.15         | 5.34           | 5.31        | 5.42        | 5.40         | 6.16            |             |             | 6.27         | 6.25         | 5.22           | 5.12        | 5.14        | 5.14         |
| 17     | Imp-17    |                    |             |             | 6.47         |                |             |             |              | 6.36            | 6.34        |             | 6.61         | 6.57         |                |             |             |              |
| 18     | Imp-18    |                    |             |             | 6.73         | 5.62           | 5.55        | 5.64        | 5.65         | 6.74            |             | 6.73        | 6.87         | 6.84         | 5.66           | 5.31        | 5.53        | 5.55         |
| 19     | Imp-19    | 5.99               |             |             | 6.93         | 5.86           | 5.80        | 5.87        | 5.86         | 6.94            | 6.93        | 6.93        | 7.08         | 7.04         |                | 5.53        |             |              |
| 20     | Imp-20    |                    |             |             | 7.43         | 6.19           | 6.14        | 6.20        | 6.18         | 7.43            | 7.43        | 7.42        | 7.57         | 7.54         | 5.99           | 5.88        | 5.88        | 5.87         |
| 21     | Imp-21    | 6.94               | 6.90        | 6.83        | 8.04         | 6.82           | 6.81        | 6.84        | 6.82         | 8.07            | 8.08        | 8.05        | 8.19         | 8.15         | 6.58           | 6.43        | 6.44        | 6.45         |
| 22     | Imp-22    |                    |             | 7.30        | 8.68         | 7.28           | 7.25        | 7.30        | 7.28         | 8.69            | 8.70        | 8.67        | 8.85         | 8.80         | 7.02           | 6.84        | 6.86        | 6.87         |
| 23     | Imp-23    |                    |             |             | 9.29         | 7.78           | 7.99        | 7.83        | 7.81         | 9.30            |             | 9.28        | 9.47         | 9.42         | 7.51           | 7.38        | 7.36        | 7.39         |
| 24     | Imp-24    |                    |             |             | 9.57         |                |             | 7.98        | 7.97         | 9.59            |             | 9.57        | 9.76         | 9.71         |                |             |             |              |
| 25     | Imp-25    |                    |             |             | 9.90         | 8.45           | 8.44        | 8.45        | 8.44         |                 |             |             | 10.09        | 10.04        | 8.13           | 7.95        | 7.95        | 7.95         |
| 26     | Imp-26    |                    |             | 8.48        | 10.11        |                |             |             |              | 10.13           | 10.13       | 10.12       | 10.32        | 10.26        |                |             |             |              |
| 27     | Imp-27    |                    |             |             | 10.35        |                |             |             |              | 10.34           | 10.33       | 10.34       | 10.55        | 10.48        |                |             |             |              |
| 28     | Imp-28    | 9.02               | 8.91        | 8.87        | 10.81        |                |             | 9.02        | 9.27         | 10.79           | 10.76       | 10.80       | 11.05        | 10.99        | 8.65           | 8.38        | 8.70        | 8.71         |
| 29     | Imp-29    |                    |             |             | 11.13        | 9.00           | 8.96        | 9.28        |              | 11.16           |             | 11.14       | 11.36        | 11.29        | 8.90           |             |             |              |
| 30     | Imp-30    | 9.59               | 9.49        | 9.43        | 11.36        | 9.28           |             |             |              | 11.32           | 11.34       |             | 11.59        | 11.52        |                |             |             |              |
| 31     | Glucagon  | 9.88               | 9.78        | 9.73        | 11.67        | 9.72           | 9.68        | 9.74        | 9.73         | 11.69           | 11.68       | 11.68       | 11.91        | 11.84        | 9.35           | 9.13        | 9.14        | 9.19         |
| 32     | Des-1     |                    |             |             | 12.64        | 10.51          | 10.47       | 10.50       | 10.49        | 12.67           | 12.67       | 12.65       | 12.90        | 12.81        | 10.08          |             | 9.84        | 9.86         |
| 33     | Des-2     | 11.43              | 11.34       |             | 13.37        | 11.15          | 11.29       | 11.14       | 11.13        | 13.38           | 13.39       | 13.37       | 13.63        | 13.54        | 10.67          | 10.41       | 10.42       | 10.44        |
| 34     | Des-3     |                    |             | 12.18       | 15.02        | 12.40          | 12.34       | 12.39       | 12.39        | 15.04           | 15.02       | 15.01       | 15.32        | 15.21        | 11.86          | 11.58       | 11.59       | 11.62        |
| 35     | Des-4     |                    |             |             | 15.48        | 12.73          | 12.68       | 12.78       | 12.77        | 15.49           | 15.50       | 15.48       | 15.80        | 15.67        | 12.21          | 11.93       | 11.94       | 11.98        |
| 36     | Imp-31    |                    |             |             |              |                |             |             | 13.28        |                 |             | 16.02       | 16.22        | 16.16        |                |             | 12.41       | 12.46        |
| 37     | Imp-32    |                    |             |             |              |                |             |             |              |                 |             |             |              |              |                |             | 14.45       | 17.73        |

G001 = AMP-glucagon; RLD = ELI-glucagon
