# Supplementary material for: Comparison of the Purity and Impurity of Glucagon-for-Injection Products under Various Stability Conditions
Source: MDPI journal article supplement (doi:10.3390/scipharm90020032), 2022-05-17
Supplement: s1 [file s1 › Table S2.pdf]

Table S2: Calculated Relative Retention Times of UPLC for Glucagon Samples.

| Peak # | Peak Name | Initial Time, 25°C |          |          |           | 6 Months, 25°C |          |          |           | 24 Months, 25°C |          |          |           |           | 6 Months, 40°C |          |          |           |
|--------|-----------|--------------------|----------|----------|-----------|----------------|----------|----------|-----------|-----------------|----------|----------|-----------|-----------|----------------|----------|----------|-----------|
|        |           | G001               |          |          | RLD       | G001           |          |          | RLD       | G001            |          |          | RLD       |           | G001           |          |          | RLD       |
|        |           | 0219 14            | 0219 14A | 0219 14B | C4641 45A | 0219 14        | 0219 14A | 0219 14B | C2155 47C | 0219 14         | 0219 14A | 0219 14B | C3048 44A | C3048 44C | 0219 14        | 0219 14A | 0219 14B | C21554 7C |
| 1      | Imp-1     | 0.166              | 0.167    | 0.168    | 0.123     |                |          |          |           | 0.124           |          | 0.123    | 0.121     | 0.122     |                |          |          |           |
| 2      | Imp-2     | 0.178              | 0.178    |          | 0.130     |                |          |          |           | 0.131           | 0.131    | 0.131    | 0.128     | 0.129     |                |          |          |           |
| 3      | Imp-3     | 0.202              | 0.203    | 0.204    |           |                |          |          |           | 0.153           | 0.153    | 0.153    |           |           | 0.210          |          | 0.213    | 0.213     |
| 4      | Imp-4     |                    |          |          |           |                |          |          |           |                 |          |          |           | 0.191     |                |          |          | 0.24      |
| 5      | Imp-5     | 0.274              | 0.274    | 0.275    | 0.253     | 0.263          | 0.263    | 0.263    | 0.263     | 0.253           | 0.253    | 0.253    | 0.252     | 0.253     | 0.277          | 0.279    | 0.278    | 0.2775    |
| 6      | Imp-6     | 0.297              | 0.297    | 0.298    | 0.277     | 0.286          | 0.286    | 0.286    | 0.286     | 0.277           | 0.277    | 0.277    | 0.276     | 0.277     | 0.299          | 0.301    | 0.301    | 0.300     |
| 7      | Imp-7     |                    |          |          | 0.291     | 0.299          |          | 0.298    | 0.299     | 0.290           | 0.290    | 0.291    | 0.289     | 0.290     |                |          |          |           |
| 8      | Imp-8     |                    |          |          | 0.309     |                |          | 0.317    | 0.317     | 0.308           |          | 0.309    | 0.308     | 0.309     | 0.327          | 0.329    | 0.328    | 0.327     |
| 9      | Imp-9     | 0.385              | 0.386    | 0.386    | 0.35      | 0.358          | 0.383    | 0.358    | 0.358     | 0.350           | 0.350    | 0.350    | 0.350     | 0.351     | 0.368          | 0.370    | 0.370    | 0.369     |
| 10     | Imp-10    |                    |          |          | 0.372     | 0.341          |          | 0.383    | 0.382     |                 |          |          | 0.371     | 0.372     | 0.396          | 0.397    | 0.395    | 0.389     |
| 11     | Imp-11    | 0.489              |          | 0.492    | 0.422     | 0.422          |          | 0.424    | 0.424     | 0.422           | 0.423    | 0.422    | 0.421     | 0.422     | 0.433          |          | 0.437    | 0.435     |
| 12     | Imp-12    | 0.508              |          | 0.509    | 0.448     | 0.441          | 0.443    | 0.439    | 0.457     | 0.449           |          | 0.449    | 0.447     | 0.448     | 0.459          | 0.465    | 0.463    | 0.464     |
| 13     | Imp-13    |                    |          |          | 0.477     | 0.479          | 0.481    | 0.479    | 0.478     | 0.476           | 0.477    | 0.476    | 0.475     | 0.477     | 0.487          | 0.488    | 0.488    | 0.485     |
| 14     | Imp-14    | 0.561              | 0.561    | 0.565    | 0.493     | 0.497          | 0.499    | 0.498    | 0.497     | 0.493           | 0.494    | 0.493    | 0.491     | 0.492     | 0.508          | 0.511    | 0.510    | 0.508     |
| 15     | Imp-15    |                    |          |          | 0.509     | 0.518          |          | 0.519    | 0.519     | 0.508           |          |          | 0.506     | 0.508     | 0.529          | 0.531    | 0.530    | 0.533     |
| 16     | Imp-16    |                    |          |          | 0.527     | 0.550          | 0.549    | 0.556    | 0.555     | 0.527           |          |          | 0.527     | 0.527     | 0.559          | 0.561    | 0.562    | 0.559     |
| 17     | Imp-17    |                    |          |          | 0.554     |                |          |          |           | 0.544           | 0.543    |          | 0.555     | 0.555     |                |          |          |           |
| 18     | Imp-18    |                    |          |          | 0.576     | 0.579          | 0.573    | 0.580    | 0.581     | 0.577           |          | 0.576    | 0.577     | 0.577     | 0.606          | 0.582    | 0.605    | 0.604     |
| 19     | Imp-19    | 0.606              |          |          | 0.594     | 0.603          | 0.599    | 0.603    | 0.602     | 0.593           | 0.594    | 0.593    | 0.594     | 0.595     |                | 0.606    |          |           |
| 20     | Imp-20    |                    |          |          | 0.636     | 0.637          | 0.635    | 0.636    | 0.635     | 0.636           | 0.637    | 0.636    | 0.635     | 0.636     | 0.641          | 0.644    | 0.643    | 0.639     |
| 21     | Imp-21    | 0.702              | 0.706    | 0.702    | 0.689     | 0.702          | 0.703    | 0.702    | 0.701     | 0.691           | 0.692    | 0.689    | 0.688     | 0.688     | 0.704          | 0.705    | 0.705    | 0.702     |
| 22     | Imp-22    |                    |          | 0.751    | 0.744     | 0.749          | 0.749    | 0.750    | 0.748     | 0.744           | 0.745    | 0.742    | 0.742     | 0.743     | 0.750          | 0.749    | 0.750    | 0.748     |
| 23     | Imp-23    |                    |          |          | 0.796     | 0.800          | 0.825    | 0.804    | 0.802     | 0.796           |          | 0.795    | 0.795     | 0.795     | 0.803          | 0.809    | 0.805    | 0.804     |
| 24     | Imp-24    |                    |          |          | 0.82      |                |          | 0.820    | 0.819     | 0.820           |          | 0.820    | 0.819     | 0.819     |                |          |          |           |
| 25     | Imp-25    |                    |          |          | 0.848     | 0.870          | 0.871    | 0.868    | 0.867     |                 |          |          | 0.846     | 0.847     | 0.869          | 0.871    | 0.869    | 0.866     |
| 26     | Imp-26    |                    |          | 0.871    | 0.866     |                |          |          |           | 0.867           | 0.867    | 0.867    | 0.867     | 0.866     |                |          |          |           |
| 27     | Imp-27    |                    |          |          | 0.886     |                |          |          |           | 0.885           | 0.884    | 0.885    | 0.885     | 0.885     |                |          |          |           |
| 28     | Imp-28    | 0.913              | 0.912    | 0.912    | 0.926     |                |          | 0.927    | 0.953     | 0.923           | 0.921    | 0.924    | 0.927     | 0.928     | 0.925          | 0.918    | 0.952    | 0.948     |
| 29     | Imp-29    |                    |          |          | 0.954     | 0.926          | 0.926    | 0.953    |           | 0.955           |          | 0.954    | 0.953     | 0.954     | 0.951          |          |          |           |
| 30     | Imp-30    | 0.970              | 0.971    | 0.969    | 0.973     | 0.955          |          |          |           | 0.969           | 0.971    |          | 0.973     | 0.972     |                |          |          |           |
| 31     | Glucagon  | 1.000              | 1.000    | 1.000    | 1.000     | 1.000          | 1.000    | 1.000    | 1.000     | 1.000           | 1.000    | 1.000    | 1.000     | 1.000     | 1.000          | 1.000    | 1.000    | 1.000     |
| 32     | Des-1     |                    |          |          | 1.083     | 1.081          | 1.082    | 1.078    | 1.078     | 1.0845          | 1.085    | 1.083    | 1.083     | 1.082     | 1.078          |          | 1.077    | 1.074     |
| 33     | Des-2     | 1.157              | 1.160    |          | 1.145     | 1.148          | 1.166    | 1.144    | 1.144     | 1.144           | 1.147    | 1.145    | 1.144     | 1.144     | 1.141          | 1.141    | 1.139    | 1.137     |
| 34     | Des-3     |                    |          | 1.252    | 1.287     | 1.277          | 1.275    | 1.272    | 1.273     | 1.287           | 1.286    | 1.285    | 1.286     | 1.284     | 1.268          | 1.269    | 1.267    | 1.265     |
| 35     | Des-4     |                    |          |          | 1.326     | 1.31           | 1.31     | 1.312    | 1.312     | 1.3257          | 1.327    | 1.325    | 1.326     | 1.323     | 1.3057         | 1.308    | 1.305    | 1.304     |
| 36     | Imp-31    |                    |          |          |           |                |          |          | 1.364     |                 |          | 1.371    | 1.362     | 1.365     |                |          | 1.357    | 1.356     |
| 37     | Imp-32    |                    |          |          |           |                |          |          |           |                 |          |          |           |           |                |          | 1.581    | 1.930     |

G001 = AMP-glucagon; RLD = ELI-glucagon
