# Supplementary figures and images for: Comparison of the Purity and Impurity of Glucagon-for-Injection Products under Various Stability Conditions
Source: MDPI journal article supplement (doi:10.3390/scipharm90020032), 2022-05-17

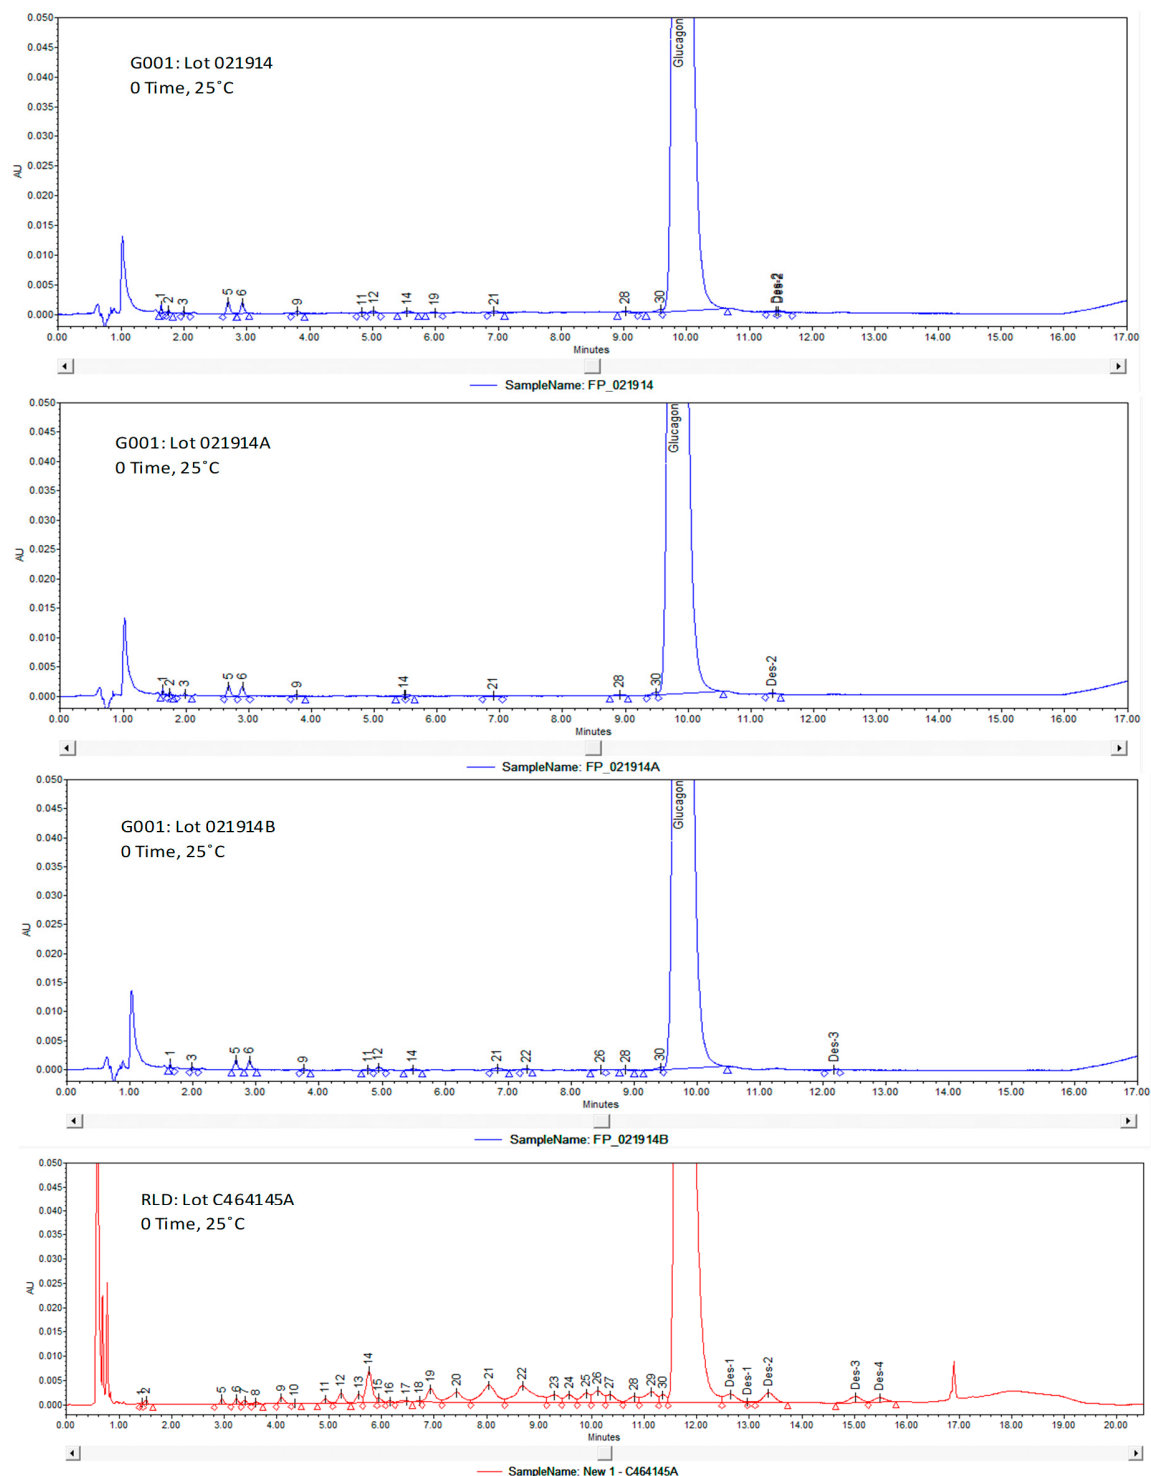

Figures S1: Glucagon Impurity Profile by UPLC at Zero Time, G001 = AMP-glucagon; RLD = ELI-glucagon

Supplement: s1 [file s1 › Figures S1.pdf]

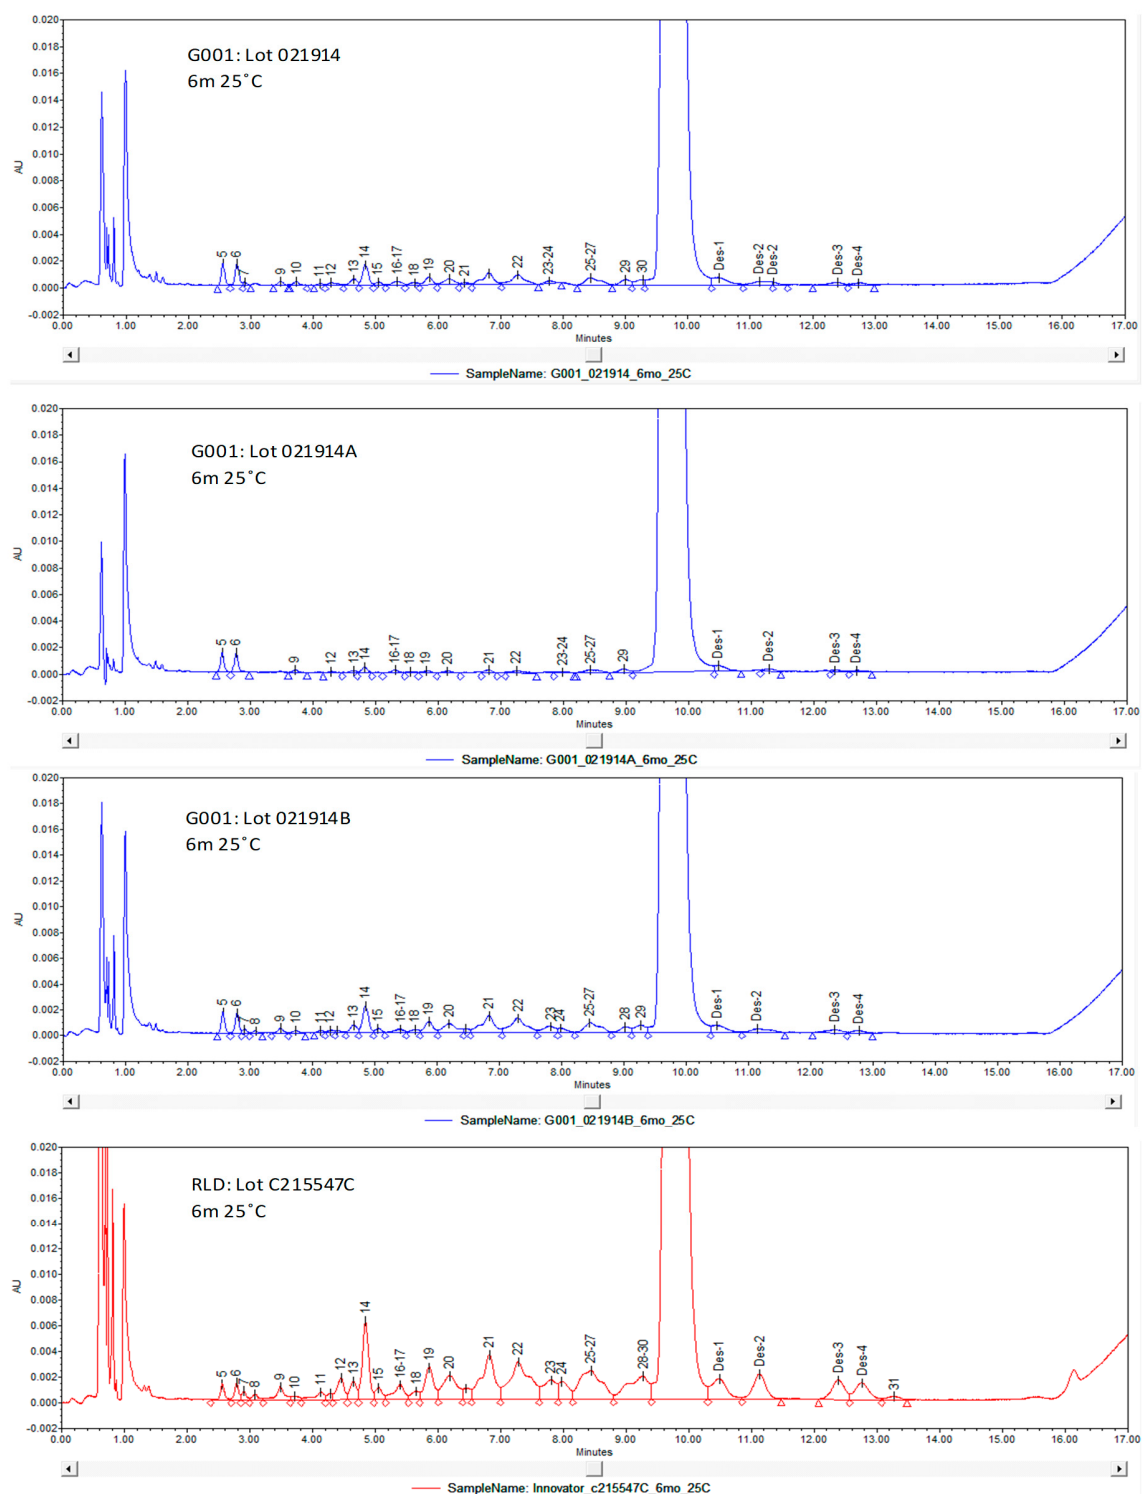

Figures S2: Glucagon Impurity Profile by UPLC at 6 Months, 25°C. G001 = AMP-glucagon; RLD = ELI-glucagon

Supplement: s1 [file s1 › Figures S2.pdf]

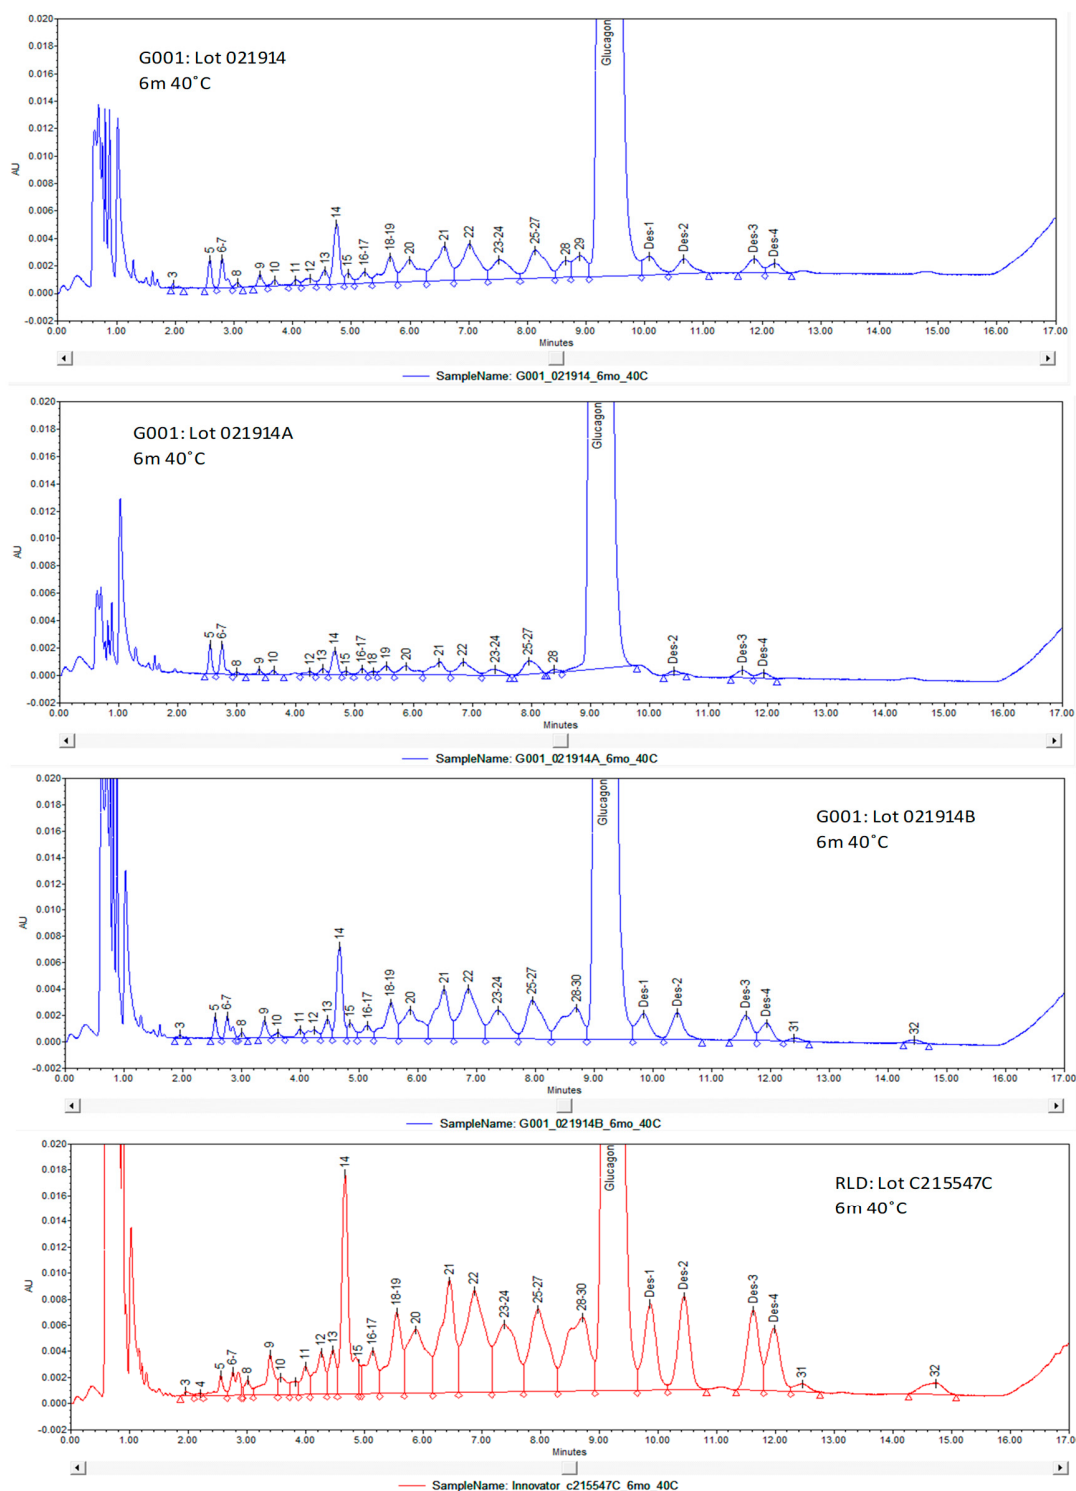

Figures S4: Glucagon Impurity Profile by UPLC at 6 Months, 40°C. G001 = AMP-glucagon; RLD = ELI-glucagon

Supplement: s1 [file s1 › Figures S4.pdf]
